# Supplementary material for: Cognitive Impairment and Risk of All‐Cause and Cardiovascular Disease Mortality Over 20‐Year Follow‐up: Results From the BLSA
Source: PubMed Central journal article supplement — J Am Heart Assoc. 2018 Aug 3;7(15):e008252. doi: 10.1161/JAHA.117.008252 (PMC6201447; doi:10.1161/jaha.117.008252), 2018-08-03
Supplement: JAH3-7-e008252-s001.pdf [file JAH3-7-e008252-s001.pdf]

# **SUPPLEMENTAL MATERIAL**

**Table S1. Hazard ratios (95% CI) for all-cause and cardiovascular disease mortality according to baseline education adjusted MMSE cut-point.**

| Cognitive function    | No.  | All-cause mortality      |            | CVD mortality            |            |
|-----------------------|------|--------------------------|------------|--------------------------|------------|
|                       |      | Hazard ratio<br>(95% CI) | P<br>value | Hazard ratio<br>(95% CI) | P<br>value |
| Cognitive impairment* | 1549 | 1.30(1.10-1.53)          | 0.002      | 1.61(1.23-2.10)          | <0.001     |
| Normal cognition      | 447  | Reference                |            | Reference                |            |

\*The education adjusted MMSE cut-off scores for cognitive impairment were 25, 27 and 29 for participants with uneducated, primary school and secondary school or above education levels.

Adjusted for age, sex, exercise, alcohol consumption, smoking status, marital status, region, body mass index, education level, activities of daily living, depression, medical history and medications by multivariate Cox models.

CVD, cardiovascular disease; MMSE, Mini-Mental State Examination

**Table S2. Hazard ratios (95% CI) for all-cause and cardiovascular disease mortality according to baseline MMSE score in people without cardiovascular disease (n=1599).**

| MMSE score            | No.  | All-cause mortality   |         | CVD mortality         |         |
|-----------------------|------|-----------------------|---------|-----------------------|---------|
|                       |      | Hazard ratio (95% CI) | P value | Hazard ratio (95% CI) | P value |
| Decreased by 5 points | 1599 | 1.38(1.24-1.53)       | <0.001  | 1.64(1.39-1.94)       | <0.001  |
| MMSE <18              | 163  | 2.20(1.57-3.07)       | <0.001  | 5.02(2.80-8.98)       | <0.001  |
| MMSE 18–23            | 631  | 1.39(1.06-1.83)       | 0.018   | 2.47(1.49-4.10)       | 0.005   |
| MMSE 24–27            | 568  | 1.09(0.84-1.40)       | 0.528   | 1.78(1.10-2.88)       | 0.019   |
| MMSE 28–30            | 237  | Reference             |         | Reference             |         |

Adjusted for age, sex, exercise, alcohol consumption, smoking status, marital status, region, body mass index, education level, activities of daily living, depression, medical history and medications by multivariate Cox models.

CVD, cardiovascular disease; MMSE, Mini-Mental State Examination
